# Supplementary material for: The C-Reactive Protein-to-Albumin Ratio (CAR) and All-Cause Mortality in Critically Ill Ischemic Stroke Patients: A Retrospective Analysis of the MIMIC-IV and eICU-CRD Databases
Source: Research Square preprint supplement (doi:10.21203/rs.3.rs-7185510/v1), 2025-09-12
Supplement: Supplementary file 1 [file 39b207593d19cd3fda7ca74c.xlsx]

## Sheet: Sheet1
Score	IDI [ 95% CI ]	P Value	Outcome
GCS Score	0.005 ( 0.0023 - 0.0077 )	<0.001	28 Days All Cause Mortality
SASPII Score	7e-04 ( -4e-04 - 0.0017 )	0.23078
SIRS Score	0.0042 ( 0.0017 - 0.0067 )	<0.001
OASIS Score	0.002 ( 2e-04 - 0.0037 )	0.02754
Charlson Score	0.0023 ( 4e-04 - 0.0042 )	0.01917
GCS Score	0.0084 ( 0.005 - 0.0119 )	<0.001	60 Days All Cause Mortality
SASPII Score	0.0016 ( 0 - 0.0032 )	0.05498
SIRS Score	0.0071 ( 0.0039 - 0.0103 )	<0.001
OASIS Score	0.0038 ( 0.0014 - 0.0061 )	0.00174
Charlson Score	0.0047 ( 0.002 - 0.0073 )	<0.001
GCS Score	0.0095 ( 0.0058 - 0.0132 )	<0.001	90 Days All Cause Mortality
SASPII Score	0.0019 ( 1e-04 - 0.0036 )	0.03667
SIRS Score	0.0077 ( 0.0044 - 0.011 )	<0.001
OASIS Score	0.0043 ( 0.0018 - 0.0068 )	<0.001
Charlson Score	0.0054 ( 0.0026 - 0.0082 )	<0.001
