# Supplementary material for: The C-Reactive Protein-to-Albumin Ratio (CAR) and All-Cause Mortality in Critically Ill Ischemic Stroke Patients: A Retrospective Analysis of the MIMIC-IV and eICU-CRD Databases
Source: Research Square preprint supplement (doi:10.21203/rs.3.rs-7185510/v1), 2025-09-12
Supplement: Supplementary file 2 [file 83fee67d310aac6480766802.xlsx]

## Sheet: Sheet1
	Model 1		Model 2		Model 3		Model 4
Categories	OR(95% CI)	P-Value	OR(95% CI)	P-Value	OR(95% CI)	P-Value	OR(95% CI)	P-Value
28 Days All Cause Mortality
Continues variable per unit	1.006 1.003, 1.009	<0.001	1.010 1.007, 1.013	<0.001	1.007 1.003, 1.010	0.014	1.006 1.003, 1.010	0.033
Quartile
Q1	——	——	——	——	——	——	——	——
Q2	1.642 1.315, 2.053	<0.001	1.818 1.438, 2.300	<0.001	1.429 1.117, 1.829	0.004	1.354 1.054, 1.739	0.018
Q3	1.740 1.394, 2.175	<0.001	2.239 1.764, 2.846	<0.001	1.823 1.420, 2.343	<0.001	1.682 1.304, 2.172	<0.001
Q4	1.698 1.361, 2.123	<0.001	2.278 1.789, 2.905	<0.001	1.624 1.257, 2.099	<0.001	1.510 1.163, 1.962	0.002
60 Days All Cause Mortality
Continues variable per unit	1.007 1.004, 1.010	<0.001	1.008 1.005, 1.011	<0.001	1.005 1.002, 1.009	0.002	1.005 1.001, 1.008	0.005
Quartile
Q1	——	——	——	——	——	——	——	——
Q2	1.662 1.335, 2.071	<0.001	1.684 1.343, 2.114	<0.001	1.335 1.052, 1.695	0.018	1.266 0.993, 1.616	0.057
Q3	1.792 1.439, 2.233	<0.001	1.903 1.514, 2.396	<0.001	1.547 1.216, 1.969	<0.001	1.418 1.109, 1.814	0.005
Q4	1.903 1.529, 2.371	<0.001	2.027 1.609, 2.557	<0.001	1.472 1.152, 1.882	0.002	1.368 1.065, 1.759	0.014
90 Days All Cause Mortality
Continues variable per unit	1.008 1.005, 1.011	<0.001	1.008 1.004, 1.011	<0.001	1.005 1.001, 1.008	0.006	1.004 1.001, 1.007	0.016
Quartile
Q1	——	——	——	——	——	——	——	——
Q2	1.690 1.358, 2.106	<0.001	1.670 1.333, 2.095	<0.001	1.325 1.045, 1.681	0.02	1.251 0.982, 1.595	0.07
Q3	1.844 1.482, 2.298	<0.001	1.843 1.468, 2.316	<0.001	1.488 1.171, 1.891	0.001	1.364 1.068, 1.743	0.013
Q4	1.994 1.603, 2.486	<0.001	1.981 1.576, 2.495	<0.001	1.432 1.123, 1.829	0.004	1.331 1.038, 1.709	0.024
MODEL1:None MODEL2:age,gender, length of stay in hospital, length of stay in ICU MODEL3:age,gender, length of stay in hospital, length of stay in ICU,GCS score,SAPSII score,SIRS score,Charlson Score MODEL4:age,gender, length of stay in hospital, length of stay in ICU,GCS score,SAPSII score,SIRS score,Charlson Score,Myocardial Infarct,Congestive Heart Failure,Peripheral Vascular Disease,Cerebrovas…
