# Supplementary material for: The C-Reactive Protein-to-Albumin Ratio (CAR) and All-Cause Mortality in Critically Ill Ischemic Stroke Patients: A Retrospective Analysis of the MIMIC-IV and eICU-CRD Databases
Source: Research Square preprint supplement (doi:10.21203/rs.3.rs-7185510/v1), 2025-09-12
Supplement: Supplementary file 3 [file 8a71e72cd75aa55987121ec6.xlsx]

## Sheet: Sheet1
Variabels	Condition	Overall	Q1	Q2	Q3	Q4	p
		2664	667	665	666	666
Gender (%)	Female	1246(46.772)	356(53.373)	325(48.872)	297(44.595)	268(40.240)	<0.001
	Male	1418(53.228)	311(46.627)	340(51.128)	369(55.405)	398(59.760)
Length of Stay in Hospital(median[IQR])		9.827[5.360,18.686]	7.060[3.898,13.659]	9.078[5.001,15.994]	11.110[6.393,21.848]	12.994[7.245,23.960]	<0.001
Length of Stay in ICU(median[IQR])		2.460[1.348,5.602]	2.090[1.200,4.725]	2.220[1.310,4.770]	2.745[1.393,6.630]	2.980[1.553,7.143]	<0.001
CRP(median[IQR])		41.200[6.900,108.950]	2.700[1.300,4.300]	16.600[10.600,29.300]	69.600[53.000,89.900]	173.600[135.500,219.175]	<0.001
Albumin(median[IQR])		3.500[3.000,3.900]	3.900[3.500,4.200]	3.600[3.100,3.900]	3.400[3.000,3.800]	3.100[2.600,3.500]	<0.001
Age(median[IQR])		68.726[58.519,78.168]	67.418[56.466,78.164]	69.168[58.454,78.539]	68.739[59.545,78.084]	70.154[60.213,78.061]	0.127
INR(median[IQR])		1.200[1.100,1.400]	1.100[1.100,1.300]	1.200[1.100,1.400]	1.200[1.100,1.400]	1.200[1.100,1.500]	<0.001
PT(median[IQR])		12.900[12.100,15.300]	12.300[11.600,14.000]	12.600[12.000,15.200]	13.300[12.100,15.600]	13.400[12.100,16.100]	<0.001
PTT(median[IQR])		32.600[28.275,55.000]	30.700[27.500,42.400]	33.100[28.000,57.300]	33.150[28.500,57.600]	34.300[29.100,60.650]	<0.001
GCS Score(median[IQR])		15.000[14.000,15.000]	15.000[14.000,15.000]	15.000[14.000,15.000]	15.000[14.000,15.000]	15.000[14.000,15.000]	0.731
SAPSII Score(median[IQR])		35.000[27.000,43.000]	31.000[23.000,38.000]	35.000[27.000,43.000]	35.000[28.000,44.000]	38.000[30.000,47.000]	<0.001
SIRS Score(median[IQR])		2.000[2.000,3.000]	2.000[1.000,3.000]	2.000[2.000,3.000]	3.000[2.000,3.000]	3.000[2.000,3.000]	<0.001
Aniongap(median[IQR])		14.000[12.000,15.000]	14.000[12.000,15.000]	14.000[12.000,16.000]	14.000[12.000,15.000]	14.000[12.000,15.000]	0.86
Bicarbonate(median[IQR])		24.000[23.000,27.000]	24.000[23.000,27.000]	24.000[22.000,27.000]	24.000[22.000,27.000]	24.000[23.000,27.000]	0.924
BUN(median[IQR])		18.000[14.000,30.000]	15.000[13.000,22.000]	18.000[14.000,29.000]	19.000[14.000,34.000]	22.000[15.000,38.000]	<0.001
Calcium(median[IQR])		9.000[8.500,9.000]	9.000[8.800,9.000]	9.000[8.600,9.100]	9.000[8.600,9.100]	8.950[8.400,9.000]	<0.001
Chloride(median[IQR])		101.000[99.000,105.000]	102.000[100.500,105.000]	102.000[99.000,105.000]	101.000[99.000,105.000]	101.000[99.000,105.000]	0.005
Creatinine(median[IQR])		0.900[0.800,1.400]	0.800[0.700,1.100]	0.900[0.800,1.400]	1.000[0.800,1.500]	1.100[0.800,1.700]	<0.001
Glucose(median[IQR])		110.000[100.000,141.000]	110.000[99.000,134.000]	110.000[100.000,140.000]	110.000[101.000,141.750]	110.000[103.000,149.000]	0.007
Sodium(median[IQR])		139.000[137.000,141.000]	139.000[137.000,142.000]	139.000[137.000,141.000]	139.000[136.000,141.000]	139.000[136.000,141.000]	0.001
Potassium(median[IQR])		4.000[3.800,4.500]	4.000[3.800,4.400]	4.100[3.800,4.400]	4.100[3.800,4.500]	4.100[3.800,4.500]	0.179
Myocardial Infarct(%)	FALSE	2260(84.835)	603(90.405)	560(84.211)	557(83.634)	540(81.081)	<0.001
	TRUE	404(15.165)	64(9.595)	105(15.789)	109(16.366)	126(18.919)
Congestive Heart Failure(%)	FALSE	1920(72.072)	563(84.408)	468(70.376)	455(68.318)	434(65.165)	NA
	TRUE	744(27.928)	104(15.592)	197(29.624)	211(31.682)	232(34.835)
Peripheral Vascular Disease(%)	FALSE	2275(85.398)	608(91.154)	580(87.218)	540(81.081)	547(82.132)	<0.001
	TRUE	389(14.602)	59(8.846)	85(12.782)	126(18.919)	119(17.868)
Cerebrovascular Disease(%)	FALSE	1252(46.997)	289(43.328)	313(47.068)	327(49.099)	323(48.498)	0.145
	TRUE	1412(53.003)	378(56.672)	352(52.932)	339(50.901)	343(51.502)
Dementia(%)	FALSE	2509(94.182)	627(94.003)	626(94.135)	622(93.393)	634(95.195)	0.557
	TRUE	155(5.818)	40(5.997)	39(5.865)	44(6.607)	32(4.805)
Chronic Pulmonary Disease(%)	FALSE	2115(79.392)	571(85.607)	505(75.940)	519(77.928)	520(78.078)	<0.001
	TRUE	549(20.608)	96(14.393)	160(24.060)	147(22.072)	146(21.922)
Diabetes WIthout Chronic Comorbidities(%)	FALSE	1954(73.348)	502(75.262)	481(72.331)	494(74.174)	477(71.622)	0.415
	TRUE	710(26.652)	165(24.738)	184(27.669)	172(25.826)	189(28.378)
Diabetes WIth Chronic Comorbidities(%)	FALSE	2186(82.057)	577(86.507)	543(81.654)	546(81.982)	520(78.078)	0.001
	TRUE	478(17.943)	90(13.493)	122(18.346)	120(18.018)	146(21.922)
Paraplegia(%)	FALSE	2292(86.036)	541(81.109)	568(85.414)	586(87.988)	597(89.640)	<0.001
	TRUE	372(13.964)	126(18.891)	97(14.586)	80(12.012)	69(10.360)
Renal Disease(%)	FALSE	1937(72.710)	552(82.759)	464(69.774)	465(69.820)	456(68.468)	<0.001
	TRUE	727(27.290)	115(17.241)	201(30.226)	201(30.180)	210(31.532)
Metastatic Solid Tumor(%)	FALSE	2556(95.946)	650(97.451)	643(96.692)	636(95.495)	627(94.144)	0.014
	TRUE	108(4.054)	17(2.549)	22(3.308)	30(4.505)	39(5.856)
Charlson SCore(median[IQR])		5.000[4.000,7.000]	5.000[3.000,7.000]	6.000[4.000,8.000]	6.000[4.000,8.000]	6.000[4.000,8.000]	<0.001
Hematocrit(median[IQR])		32.300[27.400,37.325]	35.400[30.250,39.700]	32.100[27.800,37.000]	31.750[27.300,36.300]	29.500[25.800,34.700]	<0.001
Hemoglobin(median[IQR])		10.300[8.900,12.200]	11.500[9.900,13.150]	10.300[9.000,12.100]	10.300[8.800,11.700]	9.600[8.300,11.100]	<0.001
MCH(median[IQR])		29.700[28.100,31.100]	29.800[28.300,31.200]	29.700[28.100,31.300]	29.650[28.000,31.000]	29.650[28.000,30.875]	0.043
MCHC(median[IQR])		32.300[31.400,33.300]	32.400[31.700,33.600]	32.300[31.300,33.400]	32.300[31.200,33.200]	32.300[31.100,33.100]	<0.001
MCV(median[IQR])		91.000[87.000,95.000]	91.000[87.000,95.000]	91.000[87.000,96.000]	91.000[87.000,96.000]	91.000[88.000,95.000]	0.564
Platelet Counts(median[IQR])		219.000[167.750,294.000]	214.000[172.500,266.000]	217.000[162.000,292.000]	224.000[170.000,309.000]	224.000[166.000,312.000]	0.046
RBC(median[IQR])		3.530[3.047,4.150]	3.920[3.270,4.450]	3.490[3.080,4.170]	3.480[3.030,4.028]	3.240[2.800,3.837]	<0.001
RDW(median[IQR])		14.600[13.700,16.500]	14.200[13.200,15.400]	14.600[13.700,16.200]	14.900[14.000,17.100]	15.200[14.100,17.100]	<0.001
WBC(median[IQR])		8.350[6.500,11.300]	7.800[6.300,10.550]	8.200[6.200,10.900]	8.400[6.600,11.500]	9.100[7.000,12.500]	<0.001
CAR(median[IQR])		12.192[1.917,33.580]	0.743[0.352,1.188]	4.759[3.000,8.556]	20.880[16.223,26.523]	55.510[44.042,72.167]	<0.001
28 Days All Cause Mortality (%)	FALSE	1545(57.995)	449(67.316)	370(55.639)	361(54.204)	365(54.805)	<0.001
	TRUE	1119(42.005)	218(32.684)	295(44.361)	305(45.796)	301(45.195)
60 Days All Cause Mortality (%)	FALSE	1433(53.791)	429(64.318)	346(52.030)	334(50.150)	324(48.649)	<0.001
	TRUE	1231(46.209)	238(35.682)	319(47.970)	332(49.850)	342(51.351)
90 Days All Cause Mortality (%)	FALSE	1409(52.890)	427(64.018)	341(51.278)	327(49.099)	314(47.147)	<0.001
	TRUE	1255(47.110)	240(35.982)	324(48.722)	339(50.901)	352(52.853)
