# Supplementary material for: The C-Reactive Protein-to-Albumin Ratio (CAR) and All-Cause Mortality in Critically Ill Ischemic Stroke Patients: A Retrospective Analysis of the MIMIC-IV and eICU-CRD Databases
Source: Research Square preprint supplement (doi:10.21203/rs.3.rs-7185510/v1), 2025-09-12
Supplement: Supplementary file 4 [file d13418e56cc11393bbded23f.xlsx]

## Sheet: Sheet1
Variabels	Condition	28 Days All Cause Mortality		p	60 Days All Cause Mortality		p	60 Days All Cause Mortality		p
		Survival	Non-Survival		Survival	Non-Survival		Survival	Non-Survival
		1545	1119		1433	1231		1409	1255
Gender (%)	Female	724(46.861)	522(46.649)	0.937	674(47.034)	572(46.466)	0.785	665(47.197)	581(46.295)	0.669
	Male	821(53.139)	597(53.351)		759(52.966)	659(53.534)		744(52.803)	674(53.705)
Length of Stay in Hospital(median[IQR])		10.734[5.635,23.983]	8.831[5.115,14.811]	<0.001	9.761[5.208,19.354]	9.899[5.492,17.816]	0.537	9.628[5.103,18.788]	10.077[5.540,18.389]	0.343
Length of Stay in ICU(median[IQR])		2.780[1.430,6.180]	2.100[1.250,4.775]	<0.001	2.660[1.380,5.880]	2.220[1.310,5.230]	0.027	2.640[1.370,5.760]	2.260[1.320,5.375]	0.139
CRP(median[IQR])		34.000[5.600,101.600]	49.100[10.200,116.700]	<0.001	32.600[5.300,96.700]	50.100[10.200,118.950]	<0.001	31.800[5.100,95.500]	50.200[10.300,119.800]	<0.001
Albumin(median[IQR])		3.600[3.100,4.000]	3.400[2.900,3.800]	<0.001	3.600[3.100,4.000]	3.400[2.900,3.800]	<0.001	3.600[3.100,4.000]	3.400[2.900,3.800]	<0.001
Age(median[IQR])		66.105[55.450,75.193]	72.299[62.848,81.766]	<0.001	65.722[55.111,74.884]	72.031[62.680,81.334]	<0.001	65.722[55.085,74.884]	71.970[62.605,81.125]	<0.001
INR(median[IQR])		1.200[1.100,1.300]	1.200[1.100,1.500]	<0.001	1.100[1.100,1.300]	1.200[1.100,1.500]	<0.001	1.100[1.100,1.300]	1.200[1.100,1.500]	<0.001
PT(median[IQR])		12.700[11.900,14.600]	13.200[12.100,16.100]	<0.001	12.600[11.900,14.600]	13.300[12.100,16.100]	<0.001	12.600[11.900,14.600]	13.300[12.100,16.050]	<0.001
PTT(median[IQR])		31.500[27.900,48.700]	34.600[28.950,61.400]	<0.001	31.400[27.900,48.000]	34.600[29.000,61.300]	<0.001	31.400[27.800,47.600]	34.500[29.000,60.900]	<0.001
GCS Score(median[IQR])		15.000[14.000,15.000]	15.000[14.000,15.000]	<0.001	15.000[14.000,15.000]	15.000[14.000,15.000]	<0.001	15.000[14.000,15.000]	15.000[14.000,15.000]	<0.001
SAPSII Score(median[IQR])		32.000[24.000,40.000]	38.000[31.000,47.000]	<0.001	31.000[24.000,39.000]	39.000[31.000,48.000]	<0.001	31.000[24.000,39.000]	39.000[31.000,48.000]	<0.001
SIRS Score(median[IQR])		2.000[2.000,3.000]	3.000[2.000,3.000]	0.014	2.000[2.000,3.000]	3.000[2.000,3.000]	0.001	2.000[2.000,3.000]	3.000[2.000,3.000]	<0.001
Aniongap(median[IQR])		14.000[12.000,15.000]	14.000[12.000,16.000]	0.001	14.000[12.000,15.000]	14.000[12.000,16.000]	0.001	14.000[12.000,15.000]	14.000[12.000,16.000]	0.005
Bicarbonate(median[IQR])		24.000[23.000,26.000]	24.000[22.000,27.000]	0.439	24.000[23.000,26.000]	24.000[22.000,27.000]	0.332	24.000[23.000,26.000]	24.000[22.000,27.000]	0.252
BUN(median[IQR])		16.000[13.000,25.000]	21.000[15.000,36.000]	<0.001	16.000[13.000,24.000]	22.000[15.000,38.000]	<0.001	15.000[13.000,24.000]	22.000[15.000,37.500]	<0.001
Calcium(median[IQR])		9.000[8.600,9.000]	9.000[8.400,9.000]	0.001	9.000[8.600,9.000]	9.000[8.400,9.000]	<0.001	9.000[8.600,9.000]	9.000[8.400,9.000]	<0.001
Chloride(median[IQR])		101.000[100.000,105.000]	102.000[99.000,105.000]	0.358	101.000[100.000,105.000]	102.000[99.000,105.000]	0.301	101.000[100.000,105.000]	102.000[99.000,105.000]	0.188
Creatinine(median[IQR])		0.900[0.700,1.200]	1.100[0.800,1.700]	<0.001	0.900[0.700,1.200]	1.100[0.800,1.700]	<0.001	0.900[0.700,1.200]	1.100[0.800,1.700]	<0.001
Glucose(median[IQR])		110.000[100.000,136.000]	110.000[101.000,149.500]	0.003	110.000[100.000,134.000]	110.000[101.000,150.500]	<0.001	110.000[100.000,133.000]	110.000[102.000,151.000]	<0.001
Sodium(median[IQR])		139.000[137.000,141.000]	139.000[136.000,142.000]	0.685	139.000[137.000,141.000]	139.000[136.000,142.000]	0.591	139.000[137.000,141.000]	139.000[136.000,142.000]	0.371
Potassium(median[IQR])		4.000[3.800,4.400]	4.100[3.800,4.500]	0.029	4.000[3.800,4.400]	4.100[3.800,4.500]	0.071	4.000[3.800,4.400]	4.100[3.800,4.500]	0.023
Myocardial Infarct(%)	FALSE	1344(86.990)	916(81.859)	<0.001	1250(87.230)	1010(82.047)	<0.001	1231(87.367)	1029(81.992)	<0.001
	TRUE	201(13.010)	203(18.141)		183(12.770)	221(17.953)		178(12.633)	226(18.008)
Congestive Heart Failure(%)	FALSE	1203(77.864)	717(64.075)	<0.001	1130(78.856)	790(64.175)	<0.001	1115(79.134)	805(64.143)	<0.001
	TRUE	342(22.136)	402(35.925)		303(21.144)	441(35.825)		294(20.866)	450(35.857)
Peripheral Vascular Disease(%)	FALSE	1360(88.026)	915(81.769)	<0.001	1266(88.346)	1009(81.966)	<0.001	1245(88.361)	1030(82.072)	<0.001
	TRUE	185(11.974)	204(18.231)		167(11.654)	222(18.034)		164(11.639)	225(17.928)
Cerebrovascular Disease(%)	FALSE	658(42.589)	594(53.083)	<0.001	602(42.010)	650(52.803)	<0.001	594(42.158)	658(52.430)	<0.001
	TRUE	887(57.411)	525(46.917)		831(57.990)	581(47.197)		815(57.842)	597(47.570)
Dementia(%)	FALSE	1476(95.534)	1033(92.315)	0.001	1373(95.813)	1136(92.283)	<0.001	1351(95.884)	1158(92.271)	<0.001
	TRUE	69(4.466)	86(7.685)		60(4.187)	95(7.717)		58(4.116)	97(7.729)
Chronic Pulmonary Disease(%)	FALSE	1269(82.136)	846(75.603)	<0.001	1175(81.996)	940(76.361)	<0.001	1160(82.328)	955(76.096)	<0.001
	TRUE	276(17.864)	273(24.397)		258(18.004)	291(23.639)		249(17.672)	300(23.904)
Diabetes WIthout Chronic Comorbidities(%)	FALSE	1172(75.858)	782(69.884)	0.001	1088(75.925)	866(70.349)	0.001	1071(76.011)	883(70.359)	0.001
	TRUE	373(24.142)	337(30.116)		345(24.075)	365(29.651)		338(23.989)	372(29.641)
Diabetes WIth Chronic Comorbidities(%)	FALSE	1314(85.049)	872(77.927)	<0.001	1233(86.043)	953(77.417)	<0.001	1213(86.089)	973(77.530)	<0.001
	TRUE	231(14.951)	247(22.073)		200(13.957)	278(22.583)		196(13.911)	282(22.470)
Paraplegia(%)	FALSE	1298(84.013)	994(88.829)	<0.001	1199(83.671)	1093(88.790)	<0.001	1179(83.676)	1113(88.685)	<0.001
	TRUE	247(15.987)	125(11.171)		234(16.329)	138(11.210)		230(16.324)	142(11.315)
Renal Disease(%)	FALSE	1221(79.029)	716(63.986)	<0.001	1155(80.600)	782(63.526)	<0.001	1139(80.837)	798(63.586)	<0.001
	TRUE	324(20.971)	403(36.014)		278(19.400)	449(36.474)		270(19.163)	457(36.414)
Metastatic Solid Tumor(%)	FALSE	1516(98.123)	1040(92.940)	<0.001	1407(98.186)	1149(93.339)	<0.001	1385(98.297)	1171(93.307)	<0.001
	TRUE	29(1.877)	79(7.060)		26(1.814)	82(6.661)		24(1.703)	84(6.693)
Charlson SCore(median[IQR])		5.000[3.000,7.000]	6.000[5.000,8.000]	<0.001	5.000[3.000,7.000]	6.000[5.000,8.000]	<0.001	5.000[3.000,7.000]	6.000[5.000,8.000]	<0.001
Hematocrit(median[IQR])		32.900[27.900,38.100]	31.300[26.900,35.900]	<0.001	33.300[28.400,38.500]	31.000[26.700,35.600]	<0.001	33.300[28.500,38.500]	31.000[26.650,35.650]	<0.001
Hemoglobin(median[IQR])		10.500[9.100,12.500]	10.300[8.700,11.700]	<0.001	10.700[9.200,12.600]	10.200[8.600,11.600]	<0.001	10.700[9.300,12.600]	10.200[8.600,11.600]	<0.001
MCH(median[IQR])		29.700[28.000,30.900]	29.700[28.300,31.300]	0.006	29.600[28.000,30.900]	29.700[28.300,31.300]	0.001	29.600[27.900,30.900]	29.700[28.350,31.300]	<0.001
MCHC(median[IQR])		32.300[31.400,33.400]	32.300[31.300,33.200]	0.002	32.300[31.500,33.500]	32.300[31.200,33.200]	<0.001	32.400[31.500,33.500]	32.300[31.200,33.200]	<0.001
MCV(median[IQR])		90.000[87.000,95.000]	92.000[88.000,96.000]	<0.001	90.000[87.000,94.000]	92.000[88.000,96.000]	<0.001	90.000[87.000,94.000]	92.000[88.000,96.000]	<0.001
Platelet Counts(median[IQR])		230.000[179.000,304.000]	204.000[152.000,282.500]	<0.001	231.000[179.000,303.000]	203.000[150.500,284.000]	<0.001	231.000[179.000,303.000]	204.000[150.000,284.000]	<0.001
RBC(median[IQR])		3.620[3.130,4.250]	3.420[2.950,3.970]	<0.001	3.700[3.150,4.300]	3.380[2.920,3.940]	<0.001	3.710[3.150,4.300]	3.380[2.920,3.940]	<0.001
RDW(median[IQR])		14.600[13.500,16.100]	15.100[14.000,17.100]	<0.001	14.500[13.400,15.900]	15.200[14.100,17.200]	<0.001	14.500[13.400,15.900]	15.300[14.100,17.100]	<0.001
WBC(median[IQR])		8.400[6.600,11.200]	8.300[6.400,11.650]	0.847	8.300[6.600,11.000]	8.400[6.500,11.900]	0.189	8.300[6.600,11.000]	8.500[6.500,11.900]	0.14
CAR(median[IQR])		9.868[1.500,31.514]	14.721[2.836,36.370]	<0.001	9.270[1.394,30.250]	15.162[2.909,38.168]	<0.001	8.750[1.378,29.979]	15.343[2.960,38.490]	<0.001
