# Supplementary material for: The C-Reactive Protein-to-Albumin Ratio (CAR) and All-Cause Mortality in Critically Ill Ischemic Stroke Patients: A Retrospective Analysis of the MIMIC-IV and eICU-CRD Databases
Source: Research Square preprint supplement (doi:10.21203/rs.3.rs-7185510/v1), 2025-09-12
Supplement: Supplementary file 5 [file dceaeb5c9e56502eb5c0f1b1.xlsx]

## Sheet: Sheet1
Machine Learning Models	Train Set ( MIMIC-IV Dataset )		Validation Set ( eICU-CRD Dataset )
	Accuracy (%)	AUC	Accuracy (%)	AUC
28 Days All Cause Mortality
Random Forest	70.88	0.8	88.37	0.69
Adaboost	70.38	0.77	89.53	0.72
Gradient Boosting	71.5	0.79	88.37	0.67
XGBoost	68.62	0.77	87.21	0.79
LightGBM	70.62	0.78	87.21	0.75
NeuralNetwork	70.38	0.77	88.37	0.67
60 Days All Cause Mortality
Random Forest	68.25	0.74	91.86	0.69
Adaboost	66.38	0.72	86.05	0.61
Gradient Boosting	69.25	0.75	88.37	0.72
XGBoost	64.75	0.71	88.37	0.72
LightGBM	67.38	0.74	90.7	0.73
NeuralNetwork	66.75	0.73	89.53	0.67
90 Days All Cause Mortality
Random Forest	69	0.75	93.02	0.8
Adaboost	66.62	0.73	89.53	0.73
Gradient Boosting	67	0.75	84.88	0.79
XGBoost	64.25	0.71	88.37	0.71
LightGBM	65.88	0.73	89.53	0.63
NeuralNetwork	67.75	0.74	91.86	0.65
